# Supplementary material for: Reactivity study of low-coordinate phosphaalkene IMesPPh with Grubbs first-generation ruthenium benzylidene complexes
Source: Royal Society of Chemistry journal article supplement (doi:10.1039/c3nj01416a), 2013-12-10
Supplement: c3nj01416a.pdf [file c3nj01416a.pdf]

**Reactivity study of low-coordinate phosphalkene IMes=PPh with  
Grubbs first-generation ruthenium benzylidene complexes**

*Timothy G. Larocque and Gino G. Lavoie\**

\* Department of Chemistry, York University, 4700 Keele Street,  
Toronto, Ontario, M3J 1P3, Canada

Corresponding Author: Tel: +1 416 736 2100, ext. 77728. Fax: +1 416 736 5936.

E-mail: [glavoie@yorku.ca](mailto:glavoie@yorku.ca)

New Journal of Chemistry

Supporting Information

## Table of Contents

|                                                                                                                                                                        |     |
|------------------------------------------------------------------------------------------------------------------------------------------------------------------------|-----|
| <b>General considerations</b> .....                                                                                                                                    | S3  |
| Experimental conditions .....                                                                                                                                          | S4  |
| <b>X-ray data</b>                                                                                                                                                      |     |
| Experimental procedures for X-ray diffraction data acquisition .....                                                                                                   | S3  |
| <b>Figure S1.</b> ORTEP diagram of complex <b>2</b> (30% probability level).....                                                                                       | S6  |
| <b>Figure S2.</b> ORTEP diagram of complex <b>4</b> (30% probability level).....                                                                                       | S7  |
| <b>Table S1.</b> Selected bond lengths and angles for <b>2</b> and <b>4</b> .....                                                                                      | S8  |
| <b>Table S2.</b> Crystal data and structure refinement for compound <b>2</b> .....                                                                                     | S9  |
| <b>Table S3.</b> Atomic coordinates ( $\times 10^4$ ) and equivalent isotropic displacement parameters ( $\text{\AA}^2 \times 10^3$ )<br>for compound <b>2</b> . ..... | S10 |
| <b>Table S4.</b> Bond lengths [ $\text{\AA}$ ] and angles [ $^\circ$ ] for compound <b>2</b> .....                                                                     | S12 |
| <b>Table S5.</b> Anisotropic displacement parameters ( $\text{\AA}^2 \times 10^3$ )for compound <b>2</b> . .....                                                       | S17 |
| <b>Table S6.</b> Hydrogen coordinates ( $\times 10^4$ ) and isotropic displacement parameters ( $\text{\AA}^2 \times 10^3$ )<br>for compound <b>2</b> .....            | S19 |
| <b>Table S7.</b> Crystal data and structure refinement for compound <b>4</b> .....                                                                                     | S21 |
| <b>Table S8.</b> Atomic coordinates ( $\times 10^4$ ) and equivalent isotropic displacement parameters ( $\text{\AA}^2 \times 10^3$ )<br>for compound <b>4</b> .....   | S22 |
| <b>Table S9.</b> Bond lengths [ $\text{\AA}$ ] and angles [ $^\circ$ ] for compound <b>4</b> .....                                                                     | S24 |
| <b>Table S10.</b> Anisotropic displacement parameters ( $\text{\AA}^2 \times 10^3$ ) for compound <b>4</b> .....                                                       | S29 |
| <b>References</b> .....                                                                                                                                                | S31 |

## Experimental

**General Considerations.** All manipulations involving air-sensitive materials were carried out in oven-dried glassware and performed under nitrogen using standard Schlenk line techniques or in a nitrogen atmosphere glovebox. All glassware and cannulae were dried overnight at 160 °C for at least 12 h prior to use. Solvents used in the preparation of air and/or moisture sensitive compounds were dried using an MBraun Solvent Purification System fitted with alumina columns and stored over molecular sieves under dinitrogen. IMes=P (**1**),<sup>1a</sup> RuCl<sub>2</sub>(PCy<sub>3</sub>)<sub>2</sub>(CHPh)<sup>1b</sup> and RuCl<sub>2</sub>(PPh<sub>3</sub>)<sub>2</sub>(CHPh)<sup>1b</sup> can be prepared using published procedures. Diallyl sulfide was purchased from Sigma-Aldrich and used without further purification. NMR solvents were purchased from Cambridge Isotope Laboratories and were degassed using three freeze-pump-thaw cycles. CDCl<sub>3</sub> was vacuum distilled from CaH<sub>2</sub> and stored under dinitrogen. NMR spectra were recorded on a Bruker AV 400 (<sup>1</sup>H at 400 MHz, <sup>13</sup>C at 100MHz) or Bruker AV 300 (<sup>1</sup>H at 300 MHz, <sup>13</sup>C at 75.5 MHz) spectrometer and are at room temperature unless otherwise stated. The spectra were referenced internally relative to the residual protio-solvent (<sup>1</sup>H) and solvent (<sup>13</sup>C) resonances and chemical shifts were reported with respect to δ = 0 ppm for tetramethylsilane. *J*-coupling constants are reported in Hertz (Hz). The multiplicity of signals is reported as singlet (s), doublet (d), triplet (t), quartet (q), multiplet (m), broad (br) or a combination of any of these. Where <sup>13</sup>C spectra are reported, the <sup>1</sup>H and <sup>13</sup>C assignments were confirmed by two-dimensional <sup>1</sup>H-<sup>1</sup>H, and <sup>13</sup>C-<sup>1</sup>H correlation NMR experiments. The proton or carbon attributed to the resonance is sometimes italicized for clarity. Elemental composition was determined by Guelph Chemical Laboratories Incorporated.

**Reaction of RuCl<sub>2</sub>(PPh<sub>3</sub>)<sub>2</sub>(CHPh) with IMes=PPh.** A toluene solution of IMes=PPh (**1**) (30.1 mg, 73.0 μmol) was added slowly over 1 min to a toluene solution (5 mL) of

$\text{RuCl}_2(\text{PPh}_3)_2(\text{CHPh})$  (52.1 mg, 66.2  $\mu\text{mol}$ ). The solution was stirred for 1 h at room temperature, in a color change from purple to yellowish brown and the formation of a light brown precipitate. The solution was filtered and dried under reduced pressure. Recrystallization by slow liquid diffusion of pentane into a saturated dichloromethane solution at  $-35\text{ }^\circ\text{C}$  to afford  $\text{RuCl}_2(\text{IMes}=\text{PPh})(\text{PPh}_3)(\text{CHPh})$  (**2**) as dark brown crystals (37.4 mg, 60%).  $^1\text{H}$  NMR (400 MHz,  $\text{CDCl}_3$ ):  $\delta$  15.48 (dd,  $^3J_{\text{PH}} = 9.2, 8.7$  Hz, 1H, *CHPh*), 8.14 (d,  $J = 7.4$  Hz, 1H), 7.62–7.44 (m, 5H), 7.08–6.65 (m, 18H), 6.56 (t,  $J = 9.2$ , 2H), 6.47 (br s, 2H), 6.19 (br s, 1H), 5.97 (br s, 1H), 2.54 (br s, 3H), 2.29 (br s, 3H), 2.24 (br s, 3H), 2.10 (br s, 3H), 1.60 (br s, 6H).  $^{13}\text{C}\{^1\text{H}\}$  NMR (100 MHz,  $\text{CDCl}_3$ ):  $\delta$  299.7 (*CHPh*), 169.6, 168.3, 150.9, 141.2, 21.1–20.5, 19.4–19.0, 18.5, 17.9.  $^{31}\text{P}\{^1\text{H}\}$  (121 MHz,  $\text{CDCl}_3$ ):  $\delta$  64.8 (s, *IMes=PPh*), 37.4 (s, *PPh}\_3*). Anal. Calcd. for  $\text{C}_{52}\text{H}_{50}\text{Cl}_2\text{N}_2\text{P}_2\text{Ru}$  (%): C, 66.66; H, 5.38; N, 2.99. Found (%): C, 66.46; H, 5.60; N, 2.92.

**Reaction of  $\text{RuCl}_2(\text{PCy}_3)_2(\text{CHPh})$  with *IMes=PPh*.** A toluene solution of *IMes=PPh* (**1**) (67.1 mg, 158  $\mu\text{mol}$ ) was added slowly over 1 min to a toluene solution (5 mL) of  $\text{RuCl}_2(\text{PCy}_3)_2(\text{CHPh})$  (92.7 mg, 113  $\mu\text{mol}$ ). The solution was stirred for 12 h at room temperature, resulting in a color change from purple to brown and the formation of a light brown precipitate. The volatiles were removed under reduced pressure. The product was recrystallized from pentane and dichloromethane to yield **3** as a light brown powder (85.7 mg, 83%).  $^1\text{H}$  NMR (400 MHz,  $\text{CDCl}_3$ ):  $\delta$  11.00 (s, 1H), 8.11 (m, 2H), 7.66 (br s, 1H), 7.60 (s, 2H), 7.01 (s, 4H), 6.83 (br s, 2H), 2.57 (s, 3H), 2.18 (s, 12H), 1.76–0.90 (m, 30H).  $^{31}\text{P}\{^1\text{H}\}$  (121 MHz,  $\text{CDCl}_3$ ):  $\delta$  68.8 (d,  $J = 41.1$  Hz), 64.2 (d,  $J = 41.1$  Hz). Anal. Calcd. for  $\text{C}_{52}\text{H}_{67}\text{ClN}_2\text{P}_2\text{Ru}$  (%): C, 67.99; H, 7.35; N, 3.05. Found (%): C, 68.28; H, 7.53; N, 2.77.

**Ring-closing metathesis.** The catalyst (0.006 mmol) was dissolved in  $\text{CDCl}_3$  (0.5 mL). The solution was added to either an NMR tube fitted with a rubber septum or a scintillation vial fitted with a rubber septum. The neat substrate was added via syringe and the reaction stirred at either room temperature or at 70 °C. The reaction was monitored by  $^1\text{H}$  NMR spectroscopy.

**X-ray Crystallography.** Crystallographic data were collected at the University of Toronto on a Bruker Kappa APEX-DUO diffractometer using a monochromated  $\text{Mo-K}\alpha$  radiation (Bruker Triumph;  $\lambda = 0.71073 \text{ \AA}$ ) at 150K. Data were measured using a combination of  $\phi$  scans and  $\omega$  scans, and were processed using APEX2 and SAINT.<sup>2</sup> Absorption corrections were carried out using SADABS.<sup>2</sup> Both structures were solved using Superflip<sup>3</sup> and refined using WinGX<sup>4</sup> with SHELXS-97 for full-matrix least-squares refinement that was based on  $F^2$ .<sup>5</sup> All H atoms were included in calculated positions and allowed to refine in riding-motion approximation with  $U_{\text{iso}}$  tied to the carrier atom.

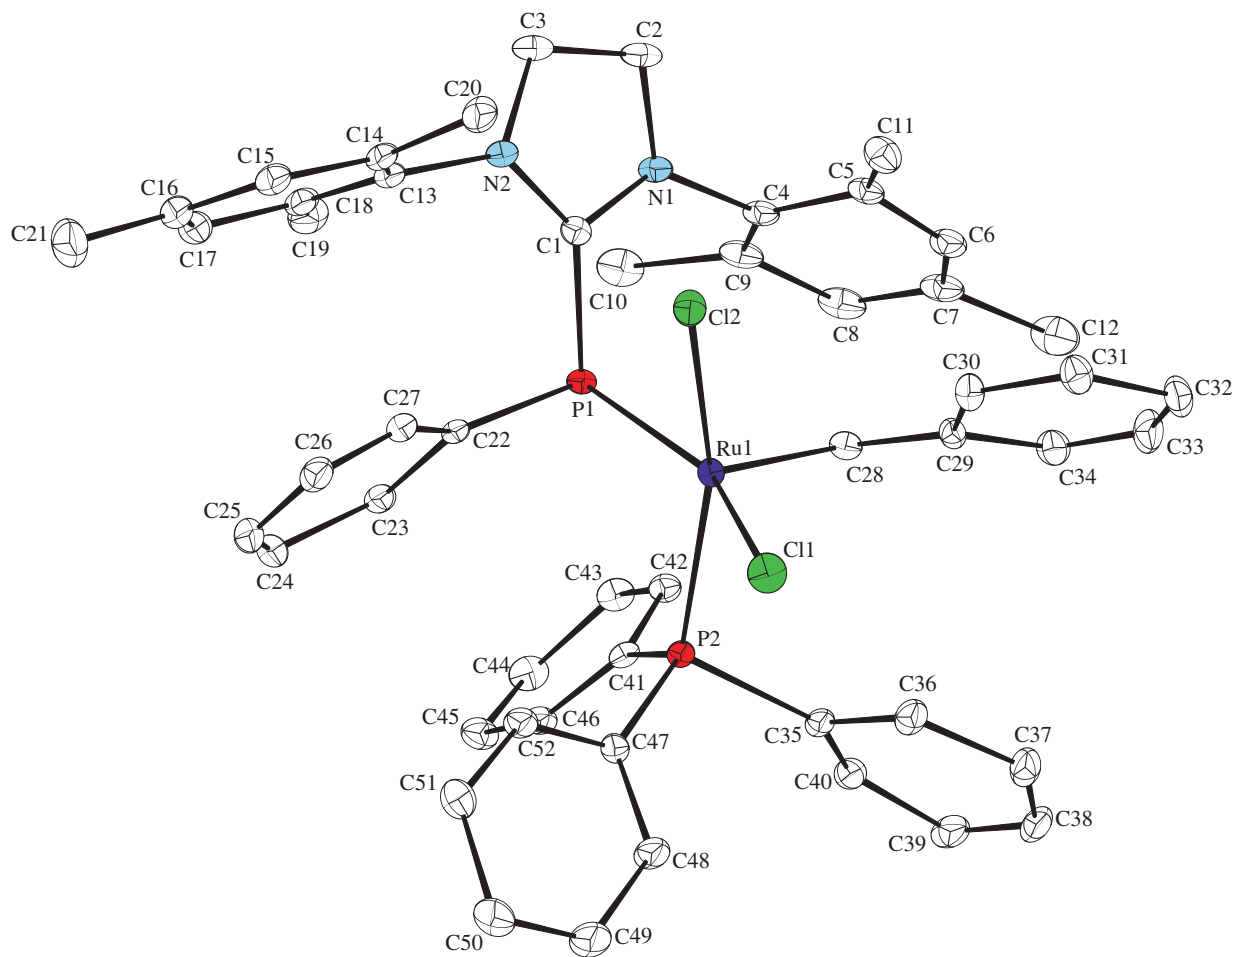

**Figure S1.** ORTEP diagram of complex **2** (30% probability level). All hydrogen atoms and one molecule of dichloromethane are omitted for clarity.

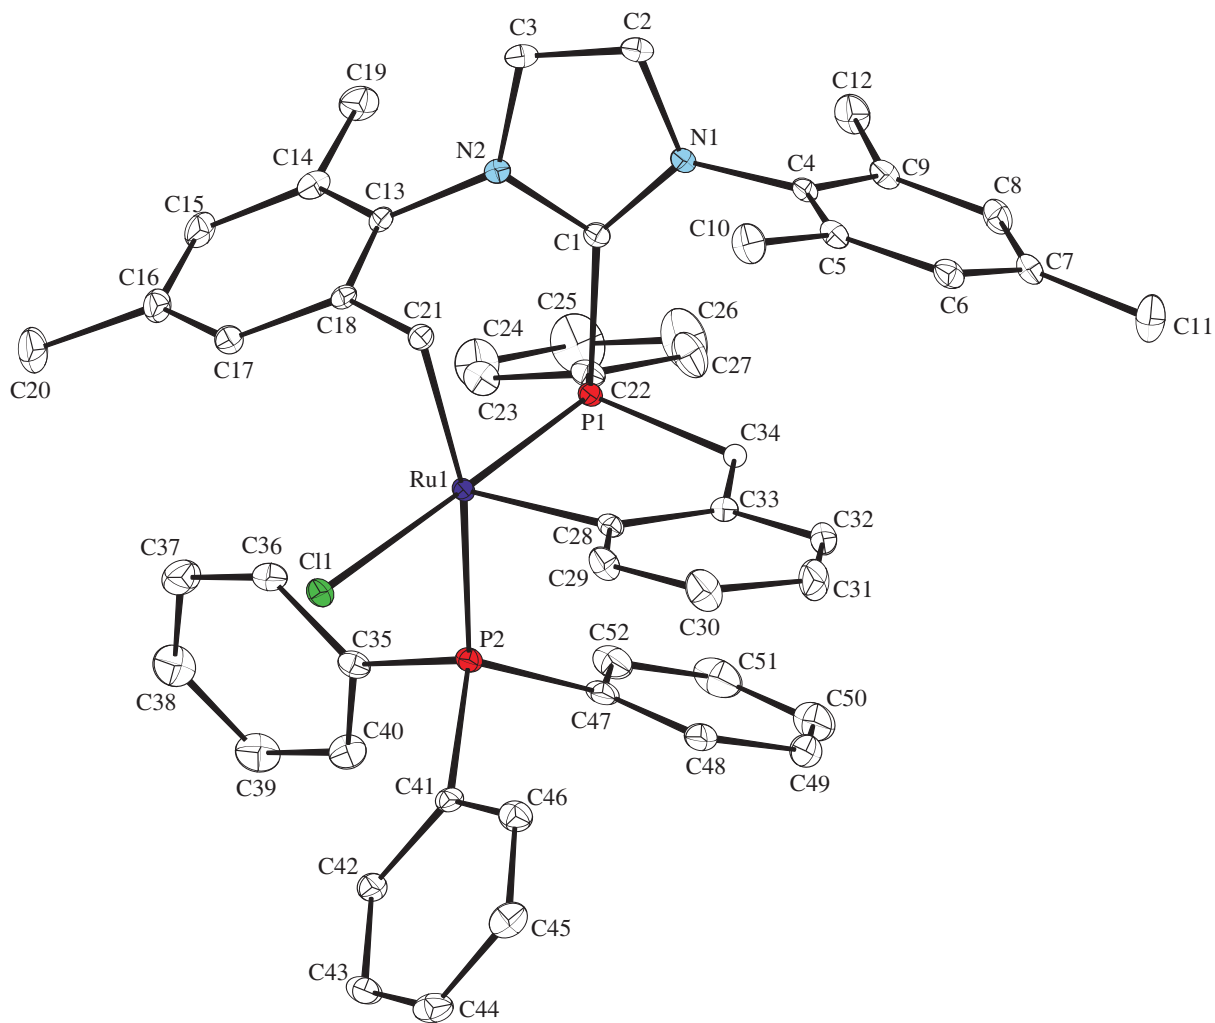

**Figure S2.** ORTEP diagram of complex 4 (30% probability level). All hydrogen atoms are omitted for clarity.

**Table S1.** Selected bond lengths and angles for **2** and **4**.

| <b>Bond lengths (Å)</b>  | <b>2</b>  | <b>4</b>  |             | <b>2</b>   | <b>4</b> |
|--------------------------|-----------|-----------|-------------|------------|----------|
| Ru1–P1                   | 2.3643(7) | 2.1844(6) | P2–C35      | 1.840(3)   | 1.841(2) |
| Ru1–P2                   | 2.3272(6) | 2.3464(7) | P2–C41      | 1.824(2)   | 1.857(2) |
| Ru1–C28                  | 1.841(3)  | 2.035(2)  | P2–C47      | 1.827(2)   | 1.859(3) |
| Ru1–C21                  | –         | 2.157(2)  | N1–C1       | 1.367(3)   | 1.352(3) |
| Ru–Cl1                   | 2.3926(6) | 2.4899(7) | N2–C1       | 1.361(3)   | 1.355(3) |
| Ru–Cl2                   | 2.4012(6) | –         | N2–C3       | 1.394(3)   | 1.384(3) |
| P1–C1                    | 1.847(2)  | 1.883(2)  | N1–C2       | 1.383(3)   | 1.391(3) |
| P1–C22                   | 1.842(3)  | 1.842(2)  | C2–C3       | 1.332(4)   | 1.346(3) |
| P1–C34                   | –         | 1.839(2)  |             |            |          |
| <b>Bond Angles (deg)</b> |           |           |             |            |          |
| P1–Ru1–P2                | 90.61(2)  | 95.21(3)  | P1–Ru1–C28  | 96.43(8)   | 80.51(6) |
| Cl1–Ru–Cl2               | 86.45(2)  | –         | Ru1–C28–C29 | 126.40(18) | –        |
| P1–Ru1–Cl1               | 158.18(2) | 177.83(2) | P2–Ru1–C21  | –          | 92.48(6) |
| P2–Ru1–Cl2               | 168.06(2) | –         | Ru1–C21–C18 | –          | 89.8(1)  |



**Table S2.** Crystal data and structure refinement for compound **2**.

|                                   |                                                                                  |                  |
|-----------------------------------|----------------------------------------------------------------------------------|------------------|
| CCDC deposition number            | 845573                                                                           |                  |
| Identification code               | d1324                                                                            |                  |
| Empirical formula                 | C <sub>53</sub> H <sub>52</sub> Cl <sub>4</sub> N <sub>2</sub> P <sub>2</sub> Ru |                  |
| Formula weight                    | 1021.78                                                                          |                  |
| Temperature                       | 150(1) K                                                                         |                  |
| Wavelength                        | 0.71073 Å                                                                        |                  |
| Crystal system                    | monoclinic                                                                       |                  |
| Space group                       | C 2/c                                                                            |                  |
| Unit cell dimensions              | a = 39.366(4) Å                                                                  | α = 90°.         |
|                                   | b = 10.3992(11) Å                                                                | β = 104.747(2)°. |
|                                   | c = 24.505(3) Å                                                                  | γ = 90°.         |
| Volume                            | 9701.5(18) Å <sup>3</sup>                                                        |                  |
| Z                                 | 8                                                                                |                  |
| Density (calculated)              | 1.399 Mg/m <sup>3</sup>                                                          |                  |
| Absorption coefficient            | 0.648 mm <sup>-1</sup>                                                           |                  |
| F(000)                            | 4208                                                                             |                  |
| Crystal size                      | 0.36 x 0.22 x 0.20 mm <sup>3</sup>                                               |                  |
| Theta range for data collection   | 1.07 to 27.52°.                                                                  |                  |
| Index ranges                      | -50 ≤ h ≤ 51, -13 ≤ k ≤ 13, -31 ≤ l ≤ 31                                         |                  |
| Reflections collected             | 42646                                                                            |                  |
| Independent reflections           | 11151 [R(int) = 0.0520]                                                          |                  |
| Completeness to theta = 27.52°    | 99.7 %                                                                           |                  |
| Refinement method                 | Full-matrix least-squares on F <sup>2</sup>                                      |                  |
| Data / restraints / parameters    | 11151 / 0 / 569                                                                  |                  |
| Goodness-of-fit on F <sup>2</sup> | 1.019                                                                            |                  |
| Final R indices [I > 2σ(I)]       | R1 = 0.0367, wR2 = 0.0736                                                        |                  |
| R indices (all data)              | R1 = 0.0579, wR2 = 0.0834                                                        |                  |
| Largest diff. peak and hole       | 0.589 and -0.555 e.Å <sup>-3</sup>                                               |                  |

**Table S3.** Atomic coordinates ( $\times 10^4$ ) and equivalent isotropic displacement parameters ( $\text{\AA}^2 \times 10^3$ ) for compound **2**.  $U(\text{eq})$  is defined as one third of the trace of the orthogonalized  $U^{ij}$  tensor.

|       | x       | y       | z       | U(eq) |
|-------|---------|---------|---------|-------|
| C(1)  | 1800(1) | 3994(2) | 2471(1) | 21(1) |
| C(1S) | 949(1)  | 8740(4) | 2356(2) | 72(1) |
| C(2)  | 2373(1) | 4551(3) | 2768(1) | 33(1) |
| C(3)  | 2272(1) | 4136(3) | 3217(1) | 35(1) |
| C(4)  | 2083(1) | 4926(2) | 1755(1) | 24(1) |
| C(5)  | 2240(1) | 4158(2) | 1423(1) | 24(1) |
| C(6)  | 2241(1) | 4616(3) | 891(1)  | 28(1) |
| C(7)  | 2100(1) | 5807(3) | 694(1)  | 33(1) |
| C(8)  | 1951(1) | 6547(3) | 1046(1) | 34(1) |
| C(9)  | 1943(1) | 6144(2) | 1583(1) | 29(1) |
| C(10) | 1792(1) | 6998(2) | 1957(1) | 37(1) |
| C(11) | 2411(1) | 2894(3) | 1629(1) | 33(1) |
| C(12) | 2124(1) | 6269(3) | 124(1)  | 47(1) |
| C(13) | 1721(1) | 3410(3) | 3431(1) | 25(1) |
| C(14) | 1747(1) | 2154(3) | 3633(1) | 27(1) |
| C(15) | 1546(1) | 1829(3) | 4004(1) | 31(1) |
| C(16) | 1337(1) | 2720(3) | 4189(1) | 35(1) |
| C(17) | 1338(1) | 3979(3) | 4001(1) | 34(1) |
| C(18) | 1527(1) | 4357(3) | 3623(1) | 28(1) |
| C(19) | 1527(1) | 5732(3) | 3431(1) | 37(1) |
| C(20) | 1983(1) | 1180(3) | 3462(1) | 35(1) |
| C(21) | 1122(1) | 2332(4) | 4593(1) | 52(1) |
| C(22) | 1057(1) | 3617(2) | 2370(1) | 19(1) |
| C(23) | 803(1)  | 4549(3) | 2381(1) | 25(1) |
| C(24) | 533(1)  | 4306(3) | 2636(1) | 34(1) |
| C(25) | 513(1)  | 3134(3) | 2891(1) | 36(1) |
| C(26) | 762(1)  | 2202(3) | 2886(1) | 31(1) |
| C(27) | 1030(1) | 2425(2) | 2624(1) | 23(1) |
| C(28) | 1495(1) | 2796(2) | 832(1)  | 21(1) |
| C(29) | 1699(1) | 2039(2) | 522(1)  | 21(1) |
| C(30) | 1817(1) | 782(2)  | 674(1)  | 27(1) |
| C(31) | 2002(1) | 122(3)  | 351(1)  | 31(1) |
| C(32) | 2063(1) | 663(3)  | -128(1) | 35(1) |
| C(33) | 1943(1) | 1884(3) | -290(1) | 39(1) |

|        |         |         |          |       |
|--------|---------|---------|----------|-------|
| C(34)  | 1764(1) | 2565(3) | 34(1)    | 29(1) |
| C(35)  | 735(1)  | 3142(2) | 35(1)    | 22(1) |
| C(36)  | 849(1)  | 2083(3) | -219(1)  | 30(1) |
| C(37)  | 835(1)  | 2097(3) | -792(1)  | 36(1) |
| C(38)  | 707(1)  | 3159(3) | -1116(1) | 39(1) |
| C(39)  | 592(1)  | 4214(3) | -872(1)  | 36(1) |
| C(40)  | 603(1)  | 4209(3) | -299(1)  | 27(1) |
| C(41)  | 664(1)  | 4779(2) | 921(1)   | 18(1) |
| C(42)  | 918(1)  | 5698(2) | 897(1)   | 22(1) |
| C(43)  | 855(1)  | 6993(2) | 959(1)   | 27(1) |
| C(44)  | 539(1)  | 7384(2) | 1055(1)  | 30(1) |
| C(45)  | 288(1)  | 6487(2) | 1092(1)  | 30(1) |
| C(46)  | 349(1)  | 5182(2) | 1022(1)  | 24(1) |
| C(47)  | 367(1)  | 2228(2) | 836(1)   | 20(1) |
| C(48)  | 103(1)  | 1915(3) | 364(1)   | 33(1) |
| C(49)  | -182(1) | 1186(3) | 415(1)   | 45(1) |
| C(50)  | -208(1) | 779(3)  | 936(1)   | 40(1) |
| C(51)  | 50(1)   | 1108(3) | 1415(1)  | 35(1) |
| C(52)  | 334(1)  | 1830(2) | 1365(1)  | 27(1) |
| Cl(1)  | 1030(1) | 149(1)  | 982(1)   | 31(1) |
| Cl(1S) | 526(1)  | 8562(1) | 2453(1)  | 78(1) |
| Cl(2)  | 1712(1) | 961(1)  | 2006(1)  | 28(1) |
| Cl(2S) | 1263(1) | 8941(1) | 2995(1)  | 65(1) |
| N(1)   | 2083(1) | 4476(2) | 2311(1)  | 23(1) |
| N(2)   | 1919(1) | 3791(2) | 3036(1)  | 25(1) |
| P(1)   | 1370(1) | 4001(1) | 1947(1)  | 18(1) |
| P(2)   | 761(1)  | 3106(1) | 796(1)   | 17(1) |
| Ru(1)  | 1270(1) | 2176(1) | 1352(1)  | 17(1) |

---

**Table S4.** Bond lengths [Å] and angles [°] for compound **2**.

---

|              |          |
|--------------|----------|
| C(1)-N(2)    | 1.361(3) |
| C(1)-N(1)    | 1.367(3) |
| C(1)-P(1)    | 1.847(2) |
| C(1S)-Cl(2S) | 1.745(4) |
| C(1S)-Cl(1S) | 1.751(4) |
| C(2)-C(3)    | 1.332(4) |
| C(2)-N(1)    | 1.383(3) |
| C(3)-N(2)    | 1.394(3) |
| C(4)-C(5)    | 1.394(4) |
| C(4)-C(9)    | 1.402(3) |
| C(4)-N(1)    | 1.439(3) |
| C(5)-C(6)    | 1.389(4) |
| C(5)-C(11)   | 1.503(3) |
| C(6)-C(7)    | 1.393(4) |
| C(7)-C(8)    | 1.390(4) |
| C(7)-C(12)   | 1.503(4) |
| C(8)-C(9)    | 1.390(4) |
| C(9)-C(10)   | 1.503(4) |
| C(13)-C(14)  | 1.391(4) |
| C(13)-C(18)  | 1.398(4) |
| C(13)-N(2)   | 1.445(3) |
| C(14)-C(15)  | 1.391(4) |
| C(14)-C(20)  | 1.504(4) |
| C(15)-C(16)  | 1.390(4) |
| C(16)-C(17)  | 1.389(4) |
| C(16)-C(21)  | 1.510(4) |
| C(17)-C(18)  | 1.386(4) |
| C(18)-C(19)  | 1.505(4) |
| C(22)-C(23)  | 1.398(3) |
| C(22)-C(27)  | 1.404(3) |
| C(22)-P(1)   | 1.843(3) |
| C(23)-C(24)  | 1.390(4) |
| C(24)-C(25)  | 1.380(4) |
| C(25)-C(26)  | 1.381(4) |
| C(26)-C(27)  | 1.387(4) |
| C(28)-C(29)  | 1.469(3) |
| C(28)-Ru(1)  | 1.841(3) |

|                     |            |
|---------------------|------------|
| C(29)-C(34)         | 1.396(4)   |
| C(29)-C(30)         | 1.406(3)   |
| C(30)-C(31)         | 1.385(4)   |
| C(31)-C(32)         | 1.378(4)   |
| C(32)-C(33)         | 1.378(4)   |
| C(33)-C(34)         | 1.383(4)   |
| C(35)-C(36)         | 1.394(4)   |
| C(35)-C(40)         | 1.398(4)   |
| C(35)-P(2)          | 1.840(3)   |
| C(36)-C(37)         | 1.389(4)   |
| C(37)-C(38)         | 1.379(4)   |
| C(38)-C(39)         | 1.381(4)   |
| C(39)-C(40)         | 1.395(4)   |
| C(41)-C(46)         | 1.389(3)   |
| C(41)-C(42)         | 1.394(3)   |
| C(41)-P(2)          | 1.824(2)   |
| C(42)-C(43)         | 1.384(3)   |
| C(43)-C(44)         | 1.384(4)   |
| C(44)-C(45)         | 1.379(4)   |
| C(45)-C(46)         | 1.397(3)   |
| C(47)-C(48)         | 1.383(3)   |
| C(47)-C(52)         | 1.396(4)   |
| C(47)-P(2)          | 1.827(2)   |
| C(48)-C(49)         | 1.385(4)   |
| C(49)-C(50)         | 1.373(4)   |
| C(50)-C(51)         | 1.384(4)   |
| C(51)-C(52)         | 1.381(3)   |
| Cl(1)-Ru(1)         | 2.3925(6)  |
| Cl(2)-Ru(1)         | 2.4012(6)  |
| P(1)-Ru(1)          | 2.3643(7)  |
| P(2)-Ru(1)          | 2.3272(6)  |
|                     |            |
| N(2)-C(1)-N(1)      | 104.77(19) |
| N(2)-C(1)-P(1)      | 136.43(19) |
| N(1)-C(1)-P(1)      | 118.01(18) |
| Cl(2S)-C(1S)-Cl(1S) | 111.8(2)   |
| C(3)-C(2)-N(1)      | 107.0(2)   |
| C(2)-C(3)-N(2)      | 107.7(2)   |
| C(5)-C(4)-C(9)      | 122.7(3)   |

|                   |            |
|-------------------|------------|
| C(5)-C(4)-N(1)    | 118.2(2)   |
| C(9)-C(4)-N(1)    | 119.0(2)   |
| C(6)-C(5)-C(4)    | 117.4(2)   |
| C(6)-C(5)-C(11)   | 120.5(2)   |
| C(4)-C(5)-C(11)   | 122.1(2)   |
| C(5)-C(6)-C(7)    | 122.2(3)   |
| C(8)-C(7)-C(6)    | 118.1(3)   |
| C(8)-C(7)-C(12)   | 122.4(3)   |
| C(6)-C(7)-C(12)   | 119.5(3)   |
| C(9)-C(8)-C(7)    | 122.4(3)   |
| C(8)-C(9)-C(4)    | 117.1(3)   |
| C(8)-C(9)-C(10)   | 120.5(2)   |
| C(4)-C(9)-C(10)   | 122.5(3)   |
| C(14)-C(13)-C(18) | 122.6(3)   |
| C(14)-C(13)-N(2)  | 119.5(2)   |
| C(18)-C(13)-N(2)  | 117.8(2)   |
| C(15)-C(14)-C(13) | 117.3(2)   |
| C(15)-C(14)-C(20) | 120.8(3)   |
| C(13)-C(14)-C(20) | 121.9(2)   |
| C(16)-C(15)-C(14) | 122.3(3)   |
| C(17)-C(16)-C(15) | 117.9(3)   |
| C(17)-C(16)-C(21) | 121.3(3)   |
| C(15)-C(16)-C(21) | 120.8(3)   |
| C(18)-C(17)-C(16) | 122.5(3)   |
| C(17)-C(18)-C(13) | 117.2(3)   |
| C(17)-C(18)-C(19) | 121.3(3)   |
| C(13)-C(18)-C(19) | 121.5(3)   |
| C(23)-C(22)-C(27) | 117.9(2)   |
| C(23)-C(22)-P(1)  | 116.32(19) |
| C(27)-C(22)-P(1)  | 125.37(18) |
| C(24)-C(23)-C(22) | 121.1(3)   |
| C(25)-C(24)-C(23) | 120.2(3)   |
| C(24)-C(25)-C(26) | 119.6(3)   |
| C(25)-C(26)-C(27) | 120.8(3)   |
| C(26)-C(27)-C(22) | 120.4(2)   |
| C(29)-C(28)-Ru(1) | 126.40(18) |
| C(34)-C(29)-C(30) | 118.1(2)   |
| C(34)-C(29)-C(28) | 118.5(2)   |
| C(30)-C(29)-C(28) | 123.3(2)   |

|                   |            |
|-------------------|------------|
| C(31)-C(30)-C(29) | 119.8(3)   |
| C(32)-C(31)-C(30) | 121.0(3)   |
| C(33)-C(32)-C(31) | 120.0(3)   |
| C(32)-C(33)-C(34) | 119.7(3)   |
| C(33)-C(34)-C(29) | 121.5(3)   |
| C(36)-C(35)-C(40) | 118.6(2)   |
| C(36)-C(35)-P(2)  | 119.7(2)   |
| C(40)-C(35)-P(2)  | 121.6(2)   |
| C(37)-C(36)-C(35) | 120.6(3)   |
| C(38)-C(37)-C(36) | 120.3(3)   |
| C(37)-C(38)-C(39) | 120.0(3)   |
| C(38)-C(39)-C(40) | 120.2(3)   |
| C(39)-C(40)-C(35) | 120.3(3)   |
| C(46)-C(41)-C(42) | 118.8(2)   |
| C(46)-C(41)-P(2)  | 123.56(18) |
| C(42)-C(41)-P(2)  | 117.60(18) |
| C(43)-C(42)-C(41) | 120.8(2)   |
| C(44)-C(43)-C(42) | 119.8(2)   |
| C(45)-C(44)-C(43) | 120.1(2)   |
| C(44)-C(45)-C(46) | 120.1(2)   |
| C(41)-C(46)-C(45) | 120.3(2)   |
| C(48)-C(47)-C(52) | 118.7(2)   |
| C(48)-C(47)-P(2)  | 122.7(2)   |
| C(52)-C(47)-P(2)  | 118.54(18) |
| C(47)-C(48)-C(49) | 120.4(3)   |
| C(50)-C(49)-C(48) | 120.3(3)   |
| C(49)-C(50)-C(51) | 120.1(3)   |
| C(52)-C(51)-C(50) | 119.6(3)   |
| C(51)-C(52)-C(47) | 120.8(2)   |
| C(1)-N(1)-C(2)    | 110.6(2)   |
| C(1)-N(1)-C(4)    | 125.82(19) |
| C(2)-N(1)-C(4)    | 123.5(2)   |
| C(1)-N(2)-C(3)    | 109.9(2)   |
| C(1)-N(2)-C(13)   | 128.3(2)   |
| C(3)-N(2)-C(13)   | 121.5(2)   |
| C(22)-P(1)-C(1)   | 103.53(11) |
| C(22)-P(1)-Ru(1)  | 98.20(8)   |
| C(1)-P(1)-Ru(1)   | 113.81(8)  |
| C(41)-P(2)-C(47)  | 104.46(11) |

|                   |            |
|-------------------|------------|
| C(41)-P(2)-C(35)  | 101.00(11) |
| C(47)-P(2)-C(35)  | 103.68(11) |
| C(41)-P(2)-Ru(1)  | 118.95(7)  |
| C(47)-P(2)-Ru(1)  | 112.19(8)  |
| C(35)-P(2)-Ru(1)  | 114.79(8)  |
| C(28)-Ru(1)-P(2)  | 86.69(7)   |
| C(28)-Ru(1)-P(1)  | 96.43(8)   |
| P(2)-Ru(1)-P(1)   | 90.61(2)   |
| C(28)-Ru(1)-Cl(1) | 105.05(8)  |
| P(2)-Ru(1)-Cl(1)  | 86.89(2)   |
| P(1)-Ru(1)-Cl(1)  | 158.18(2)  |
| C(28)-Ru(1)-Cl(2) | 104.61(7)  |
| P(2)-Ru(1)-Cl(2)  | 168.06(2)  |
| P(1)-Ru(1)-Cl(2)  | 91.89(2)   |
| Cl(1)-Ru(1)-Cl(2) | 86.45(2)   |

---

Symmetry transformations used to generate equivalent atoms:



**Table S5.** Anisotropic displacement parameters ( $\text{\AA}^2 \times 10^3$ ) for compound **2**. The anisotropic displacement factor exponent takes the form:  $-2p^2 [ h^2 a^* 2U^{11} + \dots + 2 h k a^* b^* U^{12} ]$

|       | U <sup>11</sup> | U <sup>22</sup> | U <sup>33</sup> | U <sup>23</sup> | U <sup>13</sup> | U <sup>12</sup> |
|-------|-----------------|-----------------|-----------------|-----------------|-----------------|-----------------|
| C(1)  | 20(1)           | 18(1)           | 25(2)           | -1(1)           | 5(1)            | 1(1)            |
| C(1S) | 127(4)          | 52(2)           | 42(2)           | -4(2)           | 34(2)           | -25(2)          |
| C(2)  | 17(1)           | 41(2)           | 34(2)           | -2(1)           | -4(1)           | -2(1)           |
| C(3)  | 20(1)           | 48(2)           | 31(2)           | -1(2)           | -5(1)           | -1(1)           |
| C(4)  | 16(1)           | 26(1)           | 27(2)           | 2(1)            | 1(1)            | -7(1)           |
| C(5)  | 15(1)           | 27(1)           | 30(2)           | 5(1)            | 3(1)            | -7(1)           |
| C(6)  | 18(1)           | 35(1)           | 31(2)           | 4(1)            | 4(1)            | -7(1)           |
| C(7)  | 19(1)           | 42(2)           | 35(2)           | 14(1)           | 0(1)            | -9(1)           |
| C(8)  | 23(1)           | 26(1)           | 48(2)           | 13(1)           | 1(1)            | -6(1)           |
| C(9)  | 18(1)           | 23(1)           | 42(2)           | 4(1)            | 0(1)            | -8(1)           |
| C(10) | 35(1)           | 21(1)           | 52(2)           | -4(1)           | 5(1)            | -3(1)           |
| C(11) | 29(1)           | 31(1)           | 38(2)           | 6(1)            | 11(1)           | 5(1)            |
| C(12) | 36(2)           | 57(2)           | 48(2)           | 24(2)           | 8(2)            | -4(2)           |
| C(13) | 20(1)           | 34(1)           | 18(1)           | -2(1)           | -1(1)           | 4(1)            |
| C(14) | 24(1)           | 38(2)           | 16(1)           | -1(1)           | -1(1)           | 6(1)            |
| C(15) | 30(1)           | 38(2)           | 22(2)           | 4(1)            | 1(1)            | 5(1)            |
| C(16) | 29(1)           | 51(2)           | 23(2)           | 0(1)            | 4(1)            | 7(1)            |
| C(17) | 27(1)           | 44(2)           | 29(2)           | -8(1)           | 4(1)            | 10(1)           |
| C(18) | 25(1)           | 35(1)           | 19(2)           | -3(1)           | -2(1)           | 6(1)            |
| C(19) | 39(2)           | 32(2)           | 36(2)           | -8(1)           | 3(1)            | 3(1)            |
| C(20) | 36(2)           | 44(2)           | 23(2)           | 7(1)            | 5(1)            | 15(1)           |
| C(21) | 50(2)           | 71(2)           | 43(2)           | 7(2)            | 24(2)           | 6(2)            |
| C(22) | 17(1)           | 22(1)           | 16(1)           | -4(1)           | 1(1)            | -2(1)           |
| C(23) | 23(1)           | 29(1)           | 21(2)           | -6(1)           | 2(1)            | 0(1)            |
| C(24) | 23(1)           | 48(2)           | 30(2)           | -8(1)           | 7(1)            | 5(1)            |
| C(25) | 27(1)           | 57(2)           | 26(2)           | -6(2)           | 12(1)           | -8(1)           |
| C(26) | 35(1)           | 37(2)           | 21(2)           | 1(1)            | 7(1)            | -8(1)           |
| C(27) | 23(1)           | 26(1)           | 19(1)           | -2(1)           | 2(1)            | -1(1)           |
| C(28) | 19(1)           | 17(1)           | 25(2)           | 1(1)            | 4(1)            | -1(1)           |
| C(29) | 20(1)           | 23(1)           | 23(1)           | -3(1)           | 9(1)            | -3(1)           |
| C(30) | 32(1)           | 26(1)           | 27(2)           | -2(1)           | 13(1)           | -1(1)           |
| C(31) | 33(1)           | 26(1)           | 36(2)           | -4(1)           | 14(1)           | 1(1)            |
| C(32) | 33(1)           | 41(2)           | 38(2)           | -12(1)          | 21(1)           | -4(1)           |
| C(33) | 43(2)           | 50(2)           | 29(2)           | 1(2)            | 20(1)           | -6(1)           |

|        |        |       |       |        |       |        |
|--------|--------|-------|-------|--------|-------|--------|
| C(34)  | 28(1)  | 32(1) | 29(2) | 4(1)   | 10(1) | -4(1)  |
| C(35)  | 21(1)  | 27(1) | 18(1) | -3(1)  | 5(1)  | -11(1) |
| C(36)  | 33(1)  | 31(1) | 25(2) | -6(1)  | 9(1)  | -11(1) |
| C(37)  | 36(1)  | 45(2) | 30(2) | -15(2) | 15(1) | -17(1) |
| C(38)  | 37(2)  | 62(2) | 18(2) | -6(2)  | 8(1)  | -21(2) |
| C(39)  | 31(1)  | 51(2) | 23(2) | 8(1)   | 3(1)  | -14(1) |
| C(40)  | 24(1)  | 34(1) | 23(2) | 2(1)   | 6(1)  | -6(1)  |
| C(41)  | 22(1)  | 16(1) | 16(1) | 1(1)   | 0(1)  | -1(1)  |
| C(42)  | 21(1)  | 21(1) | 23(1) | 0(1)   | 3(1)  | -2(1)  |
| C(43)  | 30(1)  | 20(1) | 29(2) | 1(1)   | 4(1)  | -4(1)  |
| C(44)  | 34(1)  | 19(1) | 34(2) | -2(1)  | 2(1)  | 4(1)   |
| C(45)  | 24(1)  | 28(1) | 36(2) | -4(1)  | 4(1)  | 4(1)   |
| C(46)  | 20(1)  | 25(1) | 25(2) | -3(1)  | 2(1)  | -3(1)  |
| C(47)  | 20(1)  | 18(1) | 23(1) | -3(1)  | 7(1)  | -4(1)  |
| C(48)  | 28(1)  | 47(2) | 24(2) | -2(1)  | 5(1)  | -16(1) |
| C(49)  | 33(2)  | 63(2) | 37(2) | -14(2) | 6(1)  | -26(2) |
| C(50)  | 30(1)  | 43(2) | 50(2) | -7(2)  | 14(1) | -21(1) |
| C(51)  | 34(1)  | 37(2) | 37(2) | 5(1)   | 16(1) | -8(1)  |
| C(52)  | 23(1)  | 31(1) | 26(2) | 0(1)   | 5(1)  | -9(1)  |
| Cl(1)  | 38(1)  | 14(1) | 41(1) | -4(1)  | 12(1) | -7(1)  |
| Cl(1S) | 102(1) | 73(1) | 56(1) | 9(1)   | 15(1) | 12(1)  |
| Cl(2)  | 32(1)  | 26(1) | 26(1) | 6(1)   | 9(1)  | 10(1)  |
| Cl(2S) | 105(1) | 43(1) | 50(1) | 7(1)   | 23(1) | -7(1)  |
| N(1)   | 18(1)  | 25(1) | 23(1) | 1(1)   | 0(1)  | -3(1)  |
| N(2)   | 20(1)  | 33(1) | 20(1) | 1(1)   | 1(1)  | 2(1)   |
| P(1)   | 16(1)  | 16(1) | 20(1) | -1(1)  | 2(1)  | 0(1)   |
| P(2)   | 18(1)  | 15(1) | 18(1) | -2(1)  | 4(1)  | -5(1)  |
| Ru(1)  | 19(1)  | 13(1) | 19(1) | 0(1)   | 7(1)  | -1(1)  |

---

**Table S6.** Hydrogen coordinates ( $\times 10^4$ ) and isotropic displacement parameters ( $\text{\AA}^2 \times 10^3$ ) for compound **2**.

|        | x    | y    | z    | U(eq) |
|--------|------|------|------|-------|
| H(1S1) | 1007 | 7986 | 2164 | 86    |
| H(1S2) | 953  | 9481 | 2117 | 86    |
| H(3)   | 2596 | 4837 | 2764 | 39    |
| H(2)   | 2412 | 4085 | 3584 | 42    |
| H(6)   | 2340 | 4110 | 658  | 34    |
| H(8)   | 1854 | 7340 | 917  | 40    |
| H(10A) | 1787 | 7870 | 1826 | 56    |
| H(10B) | 1935 | 6948 | 2337 | 56    |
| H(10C) | 1558 | 6723 | 1946 | 56    |
| H(11A) | 2452 | 2418 | 1316 | 49    |
| H(11B) | 2259 | 2408 | 1802 | 49    |
| H(11C) | 2630 | 3047 | 1900 | 49    |
| H(12A) | 1959 | 6955 | 0    | 71    |
| H(12B) | 2070 | 5573 | -141 | 71    |
| H(12C) | 2357 | 6576 | 149  | 71    |
| H(15)  | 1552 | 986  | 4134 | 37    |
| H(17)  | 1206 | 4592 | 4133 | 41    |
| H(19A) | 1408 | 6259 | 3646 | 55    |
| H(19B) | 1407 | 5789 | 3038 | 55    |
| H(19C) | 1764 | 6025 | 3486 | 55    |
| H(20A) | 1920 | 1095 | 3059 | 52    |
| H(20B) | 1956 | 365  | 3631 | 52    |
| H(20C) | 2222 | 1459 | 3588 | 52    |
| H(21A) | 877  | 2352 | 4401 | 78    |
| H(21B) | 1167 | 2919 | 4906 | 78    |
| H(21C) | 1187 | 1477 | 4729 | 78    |
| H(23)  | 816  | 5346 | 2214 | 30    |
| H(24)  | 364  | 4934 | 2635 | 40    |
| H(25)  | 333  | 2973 | 3065 | 43    |
| H(26)  | 750  | 1416 | 3061 | 37    |
| H(27)  | 1192 | 1780 | 2617 | 28    |
| H(30)  | 1772 | 395  | 990  | 33    |
| H(31)  | 2086 | -700 | 460  | 37    |

|       |         |          |         |       |
|-------|---------|----------|---------|-------|
| H(32) | 2185    | 204      | -342    | 42    |
| H(33) | 1981    | 2248     | -615    | 46    |
| H(34) | 1686    | 3393     | -75     | 35    |
| H(36) | 935     | 1362     | -4      | 35    |
| H(37) | 912     | 1386     | -957    | 43    |
| H(38) | 698     | 3164     | -1499   | 46    |
| H(39) | 506     | 4931     | -1091   | 43    |
| H(40) | 522     | 4917     | -137    | 32    |
| H(42) | 1132    | 5437     | 838     | 26    |
| H(43) | 1025    | 7598     | 937     | 32    |
| H(44) | 496     | 8254     | 1095    | 36    |
| H(45) | 78      | 6751     | 1163    | 36    |
| H(46) | 178     | 4580     | 1043    | 29    |
| H(48) | 116     | 2195     | 10      | 40    |
| H(49) | -357    | 970      | 94      | 54    |
| H(50) | -398    | 281      | 967     | 48    |
| H(51) | 31      | 844      | 1769    | 42    |
| H(52) | 507     | 2053     | 1687    | 32    |
| H(28) | 1455(6) | 3650(30) | 686(11) | 25(7) |

---

**Table S7.** Crystal data and structure refinement for compound **4**.

|                                   |                                                                     |                             |
|-----------------------------------|---------------------------------------------------------------------|-----------------------------|
| CCDC deposition number            | 945574                                                              |                             |
| Identification code               | d12283                                                              |                             |
| Empirical formula                 | C <sub>52</sub> H <sub>49</sub> Cl N <sub>2</sub> P <sub>2</sub> Ru |                             |
| Formula weight                    | 900.39                                                              |                             |
| Temperature                       | 150(1) K                                                            |                             |
| Wavelength                        | 0.71073 Å                                                           |                             |
| Crystal system                    | monoclinic                                                          |                             |
| Space group                       | P 21/n                                                              |                             |
| Unit cell dimensions              | a = 11.796(3) Å                                                     | $\alpha = 90^\circ$ .       |
|                                   | b = 18.979(5) Å                                                     | $\beta = 99.625(7)^\circ$ . |
|                                   | c = 20.473(5) Å                                                     | $\gamma = 90^\circ$ .       |
| Volume                            | 4519(2) Å <sup>3</sup>                                              |                             |
| Z                                 | 4                                                                   |                             |
| Density (calculated)              | 1.323 Mg/m <sup>3</sup>                                             |                             |
| Absorption coefficient            | 0.514 mm <sup>-1</sup>                                              |                             |
| F(000)                            | 1864                                                                |                             |
| Crystal size                      | 0.19 x 0.05 x 0.02 mm <sup>3</sup>                                  |                             |
| Theta range for data collection   | 1.47 to 27.42°.                                                     |                             |
| Index ranges                      | -15 ≤ h ≤ 15, -24 ≤ k ≤ 14, -26 ≤ l ≤ 26                            |                             |
| Reflections collected             | 40082                                                               |                             |
| Independent reflections           | 10285 [R(int) = 0.0505]                                             |                             |
| Completeness to theta = 27.42°    | 99.9 %                                                              |                             |
| Refinement method                 | Full-matrix least-squares on F <sup>2</sup>                         |                             |
| Data / restraints / parameters    | 10285 / 0 / 523                                                     |                             |
| Goodness-of-fit on F <sup>2</sup> | 1.011                                                               |                             |
| Final R indices [I > 2σ(I)]       | R1 = 0.0331, wR2 = 0.0675                                           |                             |
| R indices (all data)              | R1 = 0.0506, wR2 = 0.0736                                           |                             |
| Largest diff. peak and hole       | 0.554 and -0.359 e.Å <sup>-3</sup>                                  |                             |

**Table S8.** Atomic coordinates ( $\times 10^4$ ) and equivalent isotropic displacement parameters ( $\text{\AA}^2 \times 10^3$ ) for compound **4**.  $U(\text{eq})$  is defined as one third of the trace of the orthogonalized  $U^{ij}$  tensor.

|       | x       | y       | z       | U(eq) |
|-------|---------|---------|---------|-------|
| C(1)  | 5336(2) | 723(1)  | 3082(1) | 15(1) |
| C(2)  | 5888(2) | -178(1) | 3770(1) | 24(1) |
| C(3)  | 6477(2) | -231(1) | 3263(1) | 23(1) |
| C(4)  | 4479(2) | 675(1)  | 4123(1) | 16(1) |
| C(5)  | 4942(2) | 1194(1) | 4568(1) | 19(1) |
| C(6)  | 4209(2) | 1492(1) | 4961(1) | 21(1) |
| C(7)  | 3069(2) | 1282(1) | 4917(1) | 23(1) |
| C(8)  | 2675(2) | 727(1)  | 4495(1) | 24(1) |
| C(9)  | 3370(2) | 404(1)  | 4092(1) | 21(1) |
| C(10) | 6164(2) | 1448(1) | 4622(1) | 28(1) |
| C(11) | 2289(3) | 1641(1) | 5326(1) | 39(1) |
| C(12) | 2942(2) | -212(1) | 3656(1) | 31(1) |
| C(13) | 6660(2) | 520(1)  | 2273(1) | 17(1) |
| C(14) | 6515(2) | 76(1)   | 1728(1) | 22(1) |
| C(15) | 7078(2) | 266(1)  | 1202(1) | 26(1) |
| C(16) | 7744(2) | 869(1)  | 1223(1) | 26(1) |
| C(17) | 7852(2) | 1307(1) | 1778(1) | 21(1) |
| C(18) | 7322(2) | 1147(1) | 2330(1) | 16(1) |
| C(19) | 5784(2) | -580(1) | 1692(1) | 31(1) |
| C(20) | 8380(3) | 1051(1) | 660(1)  | 40(1) |
| C(21) | 7388(2) | 1624(1) | 2898(1) | 16(1) |
| C(22) | 3642(2) | 1015(1) | 2014(1) | 21(1) |
| C(23) | 3895(2) | 860(1)  | 1389(1) | 26(1) |
| C(24) | 3112(3) | 488(2)  | 932(2)  | 42(1) |
| C(25) | 2078(3) | 268(2)  | 1095(2) | 57(1) |
| C(26) | 1815(3) | 421(2)  | 1714(2) | 55(1) |
| C(27) | 2585(2) | 798(1)  | 2171(1) | 36(1) |
| C(28) | 5625(2) | 2721(1) | 3188(1) | 17(1) |
| C(29) | 6387(2) | 3210(1) | 3545(1) | 24(1) |
| C(30) | 6140(3) | 3551(1) | 4106(1) | 34(1) |
| C(31) | 5113(3) | 3418(1) | 4335(1) | 36(1) |
| C(32) | 4357(2) | 2922(1) | 4009(1) | 28(1) |
| C(33) | 4611(2) | 2564(1) | 3453(1) | 20(1) |
| C(34) | 3831(2) | 1985(1) | 3129(1) | 18(1) |

|       |         |         |         |       |
|-------|---------|---------|---------|-------|
| C(35) | 4650(2) | 2627(1) | 745(1)  | 20(1) |
| C(36) | 5409(2) | 2106(1) | 602(1)  | 24(1) |
| C(37) | 5384(2) | 1874(1) | -45(1)  | 34(1) |
| C(38) | 4623(3) | 2166(1) | -560(1) | 37(1) |
| C(39) | 3859(2) | 2679(1) | -426(1) | 35(1) |
| C(40) | 3865(2) | 2905(1) | 219(1)  | 27(1) |
| C(41) | 5038(2) | 3871(1) | 1570(1) | 18(1) |
| C(42) | 5065(2) | 4244(1) | 986(1)  | 22(1) |
| C(43) | 5308(2) | 4967(1) | 1009(1) | 27(1) |
| C(44) | 5502(2) | 5323(1) | 1602(1) | 29(1) |
| C(45) | 5509(2) | 4954(1) | 2188(1) | 29(1) |
| C(46) | 5289(2) | 4232(1) | 2174(1) | 24(1) |
| C(47) | 3180(2) | 2945(1) | 1698(1) | 24(1) |
| C(48) | 2838(2) | 3365(1) | 2192(1) | 31(1) |
| C(49) | 1705(3) | 3340(1) | 2313(2) | 44(1) |
| C(50) | 904(3)  | 2900(2) | 1946(2) | 54(1) |
| C(51) | 1231(2) | 2483(2) | 1460(2) | 46(1) |
| C(52) | 2364(2) | 2499(1) | 1338(1) | 32(1) |
| Cl(1) | 7539(1) | 3059(1) | 2128(1) | 20(1) |
| N(1)  | 5187(2) | 414(1)  | 3657(1) | 17(1) |
| N(2)  | 6136(2) | 330(1)  | 2843(1) | 17(1) |
| P(1)  | 4699(1) | 1514(1) | 2601(1) | 14(1) |
| P(2)  | 4722(1) | 2915(1) | 1610(1) | 16(1) |
| Ru(1) | 6003(1) | 2243(1) | 2361(1) | 13(1) |

---

**Table S9.** Bond lengths [ $\text{\AA}$ ] and angles [ $^\circ$ ] for compound **4**.

---

|             |          |
|-------------|----------|
| C(1)-N(1)   | 1.352(3) |
| C(1)-N(2)   | 1.355(3) |
| C(1)-P(1)   | 1.883(2) |
| C(2)-C(3)   | 1.346(3) |
| C(2)-N(1)   | 1.391(3) |
| C(3)-N(2)   | 1.384(3) |
| C(4)-C(5)   | 1.391(3) |
| C(4)-C(9)   | 1.397(3) |
| C(4)-N(1)   | 1.456(3) |
| C(5)-C(6)   | 1.396(3) |
| C(5)-C(10)  | 1.506(3) |
| C(6)-C(7)   | 1.391(3) |
| C(7)-C(8)   | 1.392(3) |
| C(7)-C(11)  | 1.507(3) |
| C(8)-C(9)   | 1.398(3) |
| C(9)-C(12)  | 1.506(3) |
| C(13)-C(14) | 1.386(3) |
| C(13)-C(18) | 1.418(3) |
| C(13)-N(2)  | 1.454(3) |
| C(14)-C(15) | 1.404(3) |
| C(14)-C(19) | 1.510(3) |
| C(15)-C(16) | 1.385(3) |
| C(16)-C(17) | 1.396(3) |
| C(16)-C(20) | 1.517(3) |
| C(17)-C(18) | 1.414(3) |
| C(18)-C(21) | 1.466(3) |
| C(21)-Ru(1) | 2.157(2) |
| C(22)-C(23) | 1.393(3) |
| C(22)-C(27) | 1.400(3) |
| C(22)-P(1)  | 1.842(2) |
| C(23)-C(24) | 1.391(4) |
| C(24)-C(25) | 1.382(4) |
| C(25)-C(26) | 1.385(4) |
| C(26)-C(27) | 1.389(4) |
| C(28)-C(29) | 1.408(3) |
| C(28)-C(33) | 1.426(3) |
| C(28)-Ru(1) | 2.035(2) |



|                |            |
|----------------|------------|
| C(29)-C(30)    | 1.391(3)   |
| C(30)-C(31)    | 1.393(4)   |
| C(31)-C(32)    | 1.387(4)   |
| C(32)-C(33)    | 1.400(3)   |
| C(33)-C(34)    | 1.514(3)   |
| C(34)-P(1)     | 1.839(2)   |
| C(35)-C(36)    | 1.397(3)   |
| C(35)-C(40)    | 1.400(3)   |
| C(35)-P(2)     | 1.841(2)   |
| C(36)-C(37)    | 1.392(3)   |
| C(37)-C(38)    | 1.381(4)   |
| C(38)-C(39)    | 1.385(4)   |
| C(39)-C(40)    | 1.388(3)   |
| C(41)-C(42)    | 1.394(3)   |
| C(41)-C(46)    | 1.400(3)   |
| C(41)-P(2)     | 1.857(2)   |
| C(42)-C(43)    | 1.401(3)   |
| C(43)-C(44)    | 1.375(4)   |
| C(44)-C(45)    | 1.389(3)   |
| C(45)-C(46)    | 1.394(3)   |
| C(47)-C(52)    | 1.397(4)   |
| C(47)-C(48)    | 1.399(3)   |
| C(47)-P(2)     | 1.859(2)   |
| C(48)-C(49)    | 1.400(4)   |
| C(49)-C(50)    | 1.384(5)   |
| C(50)-C(51)    | 1.377(5)   |
| C(51)-C(52)    | 1.400(4)   |
| Cl(1)-Ru(1)    | 2.4899(7)  |
| P(1)-Ru(1)     | 2.1844(6)  |
| P(2)-Ru(1)     | 2.3464(7)  |
|                |            |
| N(1)-C(1)-N(2) | 105.98(17) |
| N(1)-C(1)-P(1) | 134.54(15) |
| N(2)-C(1)-P(1) | 119.48(15) |
| C(3)-C(2)-N(1) | 107.51(19) |
| C(2)-C(3)-N(2) | 106.70(18) |
| C(5)-C(4)-C(9) | 123.53(19) |
| C(5)-C(4)-N(1) | 117.67(19) |
| C(9)-C(4)-N(1) | 118.78(19) |

|                   |            |
|-------------------|------------|
| C(4)-C(5)-C(6)    | 116.9(2)   |
| C(4)-C(5)-C(10)   | 122.79(19) |
| C(6)-C(5)-C(10)   | 120.3(2)   |
| C(7)-C(6)-C(5)    | 122.1(2)   |
| C(6)-C(7)-C(8)    | 118.4(2)   |
| C(6)-C(7)-C(11)   | 120.5(2)   |
| C(8)-C(7)-C(11)   | 121.1(2)   |
| C(7)-C(8)-C(9)    | 122.0(2)   |
| C(4)-C(9)-C(8)    | 116.7(2)   |
| C(4)-C(9)-C(12)   | 122.0(2)   |
| C(8)-C(9)-C(12)   | 121.3(2)   |
| C(14)-C(13)-C(18) | 124.64(19) |
| C(14)-C(13)-N(2)  | 118.97(18) |
| C(18)-C(13)-N(2)  | 116.36(18) |
| C(13)-C(14)-C(15) | 116.9(2)   |
| C(13)-C(14)-C(19) | 122.2(2)   |
| C(15)-C(14)-C(19) | 120.9(2)   |
| C(16)-C(15)-C(14) | 121.7(2)   |
| C(15)-C(16)-C(17) | 119.5(2)   |
| C(15)-C(16)-C(20) | 121.0(2)   |
| C(17)-C(16)-C(20) | 119.5(2)   |
| C(16)-C(17)-C(18) | 122.0(2)   |
| C(17)-C(18)-C(13) | 115.21(19) |
| C(17)-C(18)-C(21) | 122.00(18) |
| C(13)-C(18)-C(21) | 122.65(18) |
| C(18)-C(21)-Ru(1) | 89.79(13)  |
| C(23)-C(22)-C(27) | 119.0(2)   |
| C(23)-C(22)-P(1)  | 118.82(17) |
| C(27)-C(22)-P(1)  | 122.16(19) |
| C(24)-C(23)-C(22) | 120.3(2)   |
| C(25)-C(24)-C(23) | 120.3(3)   |
| C(24)-C(25)-C(26) | 119.9(3)   |
| C(25)-C(26)-C(27) | 120.2(3)   |
| C(26)-C(27)-C(22) | 120.2(3)   |
| C(29)-C(28)-C(33) | 116.40(19) |
| C(29)-C(28)-Ru(1) | 121.03(16) |
| C(33)-C(28)-Ru(1) | 122.53(16) |
| C(30)-C(29)-C(28) | 122.0(2)   |
| C(29)-C(30)-C(31) | 120.5(2)   |

|                   |            |
|-------------------|------------|
| C(32)-C(31)-C(30) | 119.1(2)   |
| C(31)-C(32)-C(33) | 120.8(2)   |
| C(32)-C(33)-C(28) | 121.0(2)   |
| C(32)-C(33)-C(34) | 120.8(2)   |
| C(28)-C(33)-C(34) | 118.18(18) |
| C(33)-C(34)-P(1)  | 104.67(14) |
| C(36)-C(35)-C(40) | 118.1(2)   |
| C(36)-C(35)-P(2)  | 118.86(18) |
| C(40)-C(35)-P(2)  | 123.02(17) |
| C(37)-C(36)-C(35) | 120.6(2)   |
| C(38)-C(37)-C(36) | 120.5(2)   |
| C(37)-C(38)-C(39) | 119.5(2)   |
| C(38)-C(39)-C(40) | 120.3(2)   |
| C(39)-C(40)-C(35) | 120.8(2)   |
| C(42)-C(41)-C(46) | 118.48(19) |
| C(42)-C(41)-P(2)  | 124.54(17) |
| C(46)-C(41)-P(2)  | 116.97(16) |
| C(41)-C(42)-C(43) | 120.2(2)   |
| C(44)-C(43)-C(42) | 120.9(2)   |
| C(43)-C(44)-C(45) | 119.4(2)   |
| C(44)-C(45)-C(46) | 120.2(2)   |
| C(45)-C(46)-C(41) | 120.7(2)   |
| C(52)-C(47)-C(48) | 118.1(2)   |
| C(52)-C(47)-P(2)  | 121.96(19) |
| C(48)-C(47)-P(2)  | 119.5(2)   |
| C(47)-C(48)-C(49) | 120.5(3)   |
| C(50)-C(49)-C(48) | 120.7(3)   |
| C(51)-C(50)-C(49) | 119.4(3)   |
| C(50)-C(51)-C(52) | 120.5(3)   |
| C(47)-C(52)-C(51) | 120.8(3)   |
| C(1)-N(1)-C(2)    | 109.52(17) |
| C(1)-N(1)-C(4)    | 126.63(17) |
| C(2)-N(1)-C(4)    | 123.70(17) |
| C(1)-N(2)-C(3)    | 110.28(17) |
| C(1)-N(2)-C(13)   | 124.57(16) |
| C(3)-N(2)-C(13)   | 124.76(17) |
| C(34)-P(1)-C(22)  | 104.51(10) |
| C(34)-P(1)-C(1)   | 107.02(10) |
| C(22)-P(1)-C(1)   | 95.67(9)   |

|                   |            |
|-------------------|------------|
| C(34)-P(1)-Ru(1)  | 107.88(7)  |
| C(22)-P(1)-Ru(1)  | 127.16(7)  |
| C(1)-P(1)-Ru(1)   | 112.78(7)  |
| C(35)-P(2)-C(41)  | 103.06(9)  |
| C(35)-P(2)-C(47)  | 102.37(11) |
| C(41)-P(2)-C(47)  | 100.45(9)  |
| C(35)-P(2)-Ru(1)  | 112.97(7)  |
| C(41)-P(2)-Ru(1)  | 116.63(8)  |
| C(47)-P(2)-Ru(1)  | 119.07(7)  |
| C(28)-Ru(1)-C(21) | 94.09(8)   |
| C(28)-Ru(1)-P(1)  | 80.51(6)   |
| C(21)-Ru(1)-P(1)  | 92.48(6)   |
| C(28)-Ru(1)-P(2)  | 95.52(6)   |
| C(21)-Ru(1)-P(2)  | 168.55(6)  |
| P(1)-Ru(1)-P(2)   | 95.21(3)   |
| C(28)-Ru(1)-Cl(1) | 98.62(6)   |
| C(21)-Ru(1)-Cl(1) | 85.59(6)   |
| P(1)-Ru(1)-Cl(1)  | 177.83(2)  |
| P(2)-Ru(1)-Cl(1)  | 86.85(3)   |

---

Symmetry transformations used to generate equivalent atoms:

**Table S10.** Anisotropic displacement parameters ( $\text{\AA}^2 \times 10^3$ ) for compound **4**. The anisotropic displacement factor exponent takes the form:  $-2p^2 [ h^2 a^* 2U^{11} + \dots + 2 h k a^* b^* U^{12} ]$

|       | U <sup>11</sup> | U <sup>22</sup> | U <sup>33</sup> | U <sup>23</sup> | U <sup>13</sup> | U <sup>12</sup> |
|-------|-----------------|-----------------|-----------------|-----------------|-----------------|-----------------|
| C(1)  | 15(1)           | 12(1)           | 16(1)           | -1(1)           | 2(1)            | -3(1)           |
| C(2)  | 28(1)           | 19(1)           | 27(1)           | 9(1)            | 7(1)            | 5(1)            |
| C(3)  | 26(1)           | 15(1)           | 28(1)           | 4(1)            | 5(1)            | 6(1)            |
| C(4)  | 19(1)           | 17(1)           | 14(1)           | 5(1)            | 4(1)            | 1(1)            |
| C(5)  | 18(1)           | 21(1)           | 17(1)           | 5(1)            | 2(1)            | -3(1)           |
| C(6)  | 28(1)           | 21(1)           | 13(1)           | 1(1)            | 2(1)            | -2(1)           |
| C(7)  | 28(1)           | 24(1)           | 18(1)           | 5(1)            | 9(1)            | 1(1)            |
| C(8)  | 18(1)           | 29(1)           | 25(1)           | 4(1)            | 6(1)            | -6(1)           |
| C(9)  | 24(1)           | 20(1)           | 19(1)           | 3(1)            | 5(1)            | -5(1)           |
| C(10) | 21(1)           | 34(1)           | 28(2)           | -3(1)           | 3(1)            | -9(1)           |
| C(11) | 36(2)           | 49(2)           | 38(2)           | -7(1)           | 20(1)           | -1(1)           |
| C(12) | 33(2)           | 28(1)           | 33(2)           | -6(1)           | 9(1)            | -12(1)          |
| C(13) | 17(1)           | 17(1)           | 17(1)           | 1(1)            | 5(1)            | 6(1)            |
| C(14) | 23(1)           | 19(1)           | 24(1)           | -2(1)           | 2(1)            | 5(1)            |
| C(15) | 32(2)           | 29(1)           | 18(1)           | -7(1)           | 5(1)            | 7(1)            |
| C(16) | 27(1)           | 33(1)           | 18(1)           | 3(1)            | 7(1)            | 9(1)            |
| C(17) | 19(1)           | 22(1)           | 23(1)           | 4(1)            | 5(1)            | 3(1)            |
| C(18) | 13(1)           | 18(1)           | 18(1)           | 3(1)            | 2(1)            | 6(1)            |
| C(19) | 40(2)           | 22(1)           | 30(2)           | -7(1)           | 4(1)            | -1(1)           |
| C(20) | 45(2)           | 52(2)           | 28(2)           | 0(1)            | 20(1)           | 5(1)            |
| C(21) | 13(1)           | 18(1)           | 17(1)           | 2(1)            | 2(1)            | 1(1)            |
| C(22) | 19(1)           | 20(1)           | 22(1)           | 5(1)            | -2(1)           | -3(1)           |
| C(23) | 24(1)           | 28(1)           | 24(1)           | 1(1)            | -1(1)           | -4(1)           |
| C(24) | 43(2)           | 51(2)           | 30(2)           | -11(1)          | -2(1)           | -8(1)           |
| C(25) | 46(2)           | 72(2)           | 47(2)           | -17(2)          | -10(2)          | -28(2)          |
| C(26) | 33(2)           | 79(2)           | 52(2)           | -7(2)           | 3(2)            | -31(2)          |
| C(27) | 28(2)           | 47(2)           | 32(2)           | 3(1)            | 6(1)            | -14(1)          |
| C(28) | 22(1)           | 15(1)           | 14(1)           | 4(1)            | 4(1)            | 1(1)            |
| C(29) | 28(1)           | 25(1)           | 19(1)           | 0(1)            | 6(1)            | -6(1)           |
| C(30) | 48(2)           | 31(1)           | 23(1)           | -8(1)           | 10(1)           | -13(1)          |
| C(31) | 56(2)           | 29(1)           | 30(2)           | -10(1)          | 24(2)           | -4(1)           |
| C(32) | 37(2)           | 22(1)           | 31(2)           | 2(1)            | 20(1)           | 2(1)            |
| C(33) | 24(1)           | 16(1)           | 21(1)           | 4(1)            | 8(1)            | 4(1)            |
| C(35) | 20(1)           | 17(1)           | 21(1)           | 2(1)            | 1(1)            | -4(1)           |

|       |       |       |       |       |       |       |
|-------|-------|-------|-------|-------|-------|-------|
| C(36) | 25(1) | 21(1) | 25(1) | 4(1)  | 1(1)  | 2(1)  |
| C(37) | 45(2) | 27(1) | 32(2) | -4(1) | 8(1)  | 5(1)  |
| C(38) | 50(2) | 36(1) | 21(1) | -7(1) | 0(1)  | -4(1) |
| C(39) | 38(2) | 40(1) | 22(1) | 2(1)  | -9(1) | 1(1)  |
| C(40) | 22(1) | 31(1) | 26(1) | 1(1)  | -3(1) | 2(1)  |
| C(41) | 14(1) | 16(1) | 24(1) | 4(1)  | 3(1)  | 3(1)  |
| C(42) | 19(1) | 21(1) | 25(1) | 4(1)  | 5(1)  | 3(1)  |
| C(43) | 24(1) | 24(1) | 33(2) | 12(1) | 4(1)  | 0(1)  |
| C(44) | 22(1) | 19(1) | 44(2) | 3(1)  | 2(1)  | -2(1) |
| C(45) | 25(1) | 26(1) | 34(2) | -7(1) | 1(1)  | -1(1) |
| C(46) | 22(1) | 24(1) | 24(1) | 3(1)  | 1(1)  | 0(1)  |
| C(47) | 18(1) | 23(1) | 32(1) | 16(1) | 4(1)  | 4(1)  |
| C(48) | 29(2) | 28(1) | 38(2) | 16(1) | 13(1) | 10(1) |
| C(49) | 37(2) | 42(1) | 61(2) | 25(1) | 29(2) | 18(1) |
| C(50) | 24(2) | 58(2) | 86(3) | 39(2) | 24(2) | 11(1) |
| C(51) | 20(2) | 52(2) | 63(2) | 27(2) | -1(2) | -5(1) |
| C(52) | 20(1) | 36(1) | 40(2) | 16(1) | 0(1)  | 0(1)  |
| Cl(1) | 19(1) | 19(1) | 25(1) | 4(1)  | 8(1)  | -2(1) |
| N(1)  | 18(1) | 16(1) | 18(1) | 4(1)  | 5(1)  | 0(1)  |
| N(2)  | 19(1) | 14(1) | 18(1) | 1(1)  | 5(1)  | 2(1)  |
| P(1)  | 14(1) | 14(1) | 15(1) | 2(1)  | 3(1)  | 0(1)  |
| P(2)  | 15(1) | 16(1) | 18(1) | 4(1)  | 3(1)  | 1(1)  |
| Ru(1) | 13(1) | 14(1) | 13(1) | 2(1)  | 3(1)  | 0(1)  |

---

## References

- 1 A. J. Arduengo, III, J. C. Calabrese, A. H. Cowley, H. V. R. Dias, J. R. Goerlich, W. J. Marshall and B. Riegel, *Inorg. Chem.*, 1997, **36**, 2151–2158; P. Schwab, R. H. Grubbs and J. W. Ziller, *J. Am. Chem. Soc.*, 1996, **118**, 100–110.
- 2 APEX, SAINT, SADABS. Bruker AXS, Inc.: Madison, Wisconsin, USA, 2007.
- 3 L. Palatinus and G. Chapuis, *J. Appl. Crystallogr.*, 2007, **40**, 786–790.
- 4 L. G. Farrugia, *J. App. Cryst.*, 1999, **32**, 837–838.
- 5 G. M. Sheldrick, *Acta Crystallogr., Sect. A: Found. Crystallogr.*, 1990, **A46**, 467–473.
